# Supplementary material for: Engagement With Crisis Text Line Among Subgroups of Users Who Reported Suicidality
Source: Atypon-hosted journal article supplement (doi:10.1176/appi.ps.201900149), 2019-12-04
Supplement: appi.ps.201900149.ds001.pdf [file appi.ps.201900149.ds001.pdf]

**Supplementary Table 1. Model fit indices for 1- to 5-class models for each frequency/conversation subsample.<sup>a</sup>****PANEL A. Model fit indices for one-time texter (single conversation), n=92,304**

| <u>Number of</u><br><u>Free</u><br><u>Classes</u> | <u>Parameters</u> | <u>Log</u><br><u>Likelihood</u> | <u>Information Criteria</u> |                |                | <u>LMR Likelihood Ratio</u><br><u>Test</u> |                | <u>Entropy</u> | <u>Error</u><br><u>Message</u> | <u>Smallest</u><br><u>Class Size</u> |            |
|---------------------------------------------------|-------------------|---------------------------------|-----------------------------|----------------|----------------|--------------------------------------------|----------------|----------------|--------------------------------|--------------------------------------|------------|
|                                                   |                   |                                 | <u>AIC</u>                  | <u>BIC</u>     | <u>aBIC</u>    | <u>Statistic</u>                           | <u>p-value</u> |                |                                | <u>N</u>                             | <u>%</u>   |
| 1                                                 | 28                | -528381                         | 1056818                     | 1057082        | 1056993        | NA                                         | NA             | NA             | No                             | 92304                                | 100        |
| 2                                                 | 57                | -511452                         | 1023017                     | 1023555        | 1023374        | 33756.830                                  | 0.0000         | 0.754          | No                             | 20651                                | 22.4       |
| <b>3</b>                                          | <b>86</b>         | <b>-508313</b>                  | <b>1016798</b>              | <b>1017609</b> | <b>1017336</b> | <b>6258.486</b>                            | <b>0.0000</b>  | <b>0.758</b>   | <b>No</b>                      | <b>8143</b>                          | <b>8.8</b> |
| 4                                                 | 115               | -506857                         | 1013943                     | 1015028        | 1014662        | 2904.154                                   | 0.0000         | 0.751          | No                             | 4658                                 | 5.0        |
| 5                                                 | 144               | -505466                         | 1011220                     | 1012578        | 1012121        | 2772.907                                   | 0.0000         | 0.628          | No                             | 2900                                 | 3.1        |

**PANEL B. Model fit indices for two-time texter, first conversation, n=15,999**

| <u>Number of</u><br><u>Free</u><br><u>Classes</u> | <u>Parameters</u> | <u>Log</u><br><u>Likelihood</u> | <u>Information Criteria</u> |                 |                 | <u>LMR Likelihood Ratio</u><br><u>Test</u> |                | <u>Entropy</u> | <u>Error</u><br><u>Message</u> | <u>Smallest</u><br><u>Class Size</u> |             |
|---------------------------------------------------|-------------------|---------------------------------|-----------------------------|-----------------|-----------------|--------------------------------------------|----------------|----------------|--------------------------------|--------------------------------------|-------------|
|                                                   |                   |                                 | <u>AIC</u>                  | <u>BIC</u>      | <u>aBIC</u>     | <u>Statistic</u>                           | <u>p-value</u> |                |                                | <u>N</u>                             | <u>%</u>    |
| 1                                                 | 28                | -93019.358                      | 186094.7                    | 186309.8        | 186220.8        | NA                                         | NA             | NA             | No                             | 15999                                | 100         |
| 2                                                 | 57                | -89700.46                       | 179514.9                    | 179952.7        | 179771.6        | 6614.236                                   | 0.0000         | 0.781          | No                             | 3560                                 | 22.3        |
| <b>3</b>                                          | <b>86</b>         | <b>-89027.96</b>                | <b>178227.9</b>             | <b>178888.4</b> | <b>178615.1</b> | <b>1340.217</b>                            | <b>0.0000</b>  | <b>0.776</b>   | <b>No</b>                      | <b>1685</b>                          | <b>10.5</b> |
| 4                                                 | 115               | -88720.59                       | 177671.2                    | 178554.4        | 178188.9        | 612.569                                    | 0.0004         | 0.625          | No                             | 916                                  | 5.7         |
| 5                                                 | 144               | -88477.92                       | 177243.8                    | 178349.8        | 177892.2        | 483.615                                    | 0.0006         | 0.633          | No                             | 690                                  | 4.3         |

**PANEL C. Model fit indices for two-time texter, second conversation, n=15,999**

| <u>Number of</u><br><u>Free</u><br><u>Classes</u> | <u>Parameters</u> | <u>Log</u><br><u>Likelihood</u> | <u>Information Criteria</u> |            |             | <u>LMR Likelihood Ratio</u><br><u>Test</u> |                | <u>Entropy</u> | <u>Error</u><br><u>Message</u> | <u>Smallest</u><br><u>Class Size</u> |          |
|---------------------------------------------------|-------------------|---------------------------------|-----------------------------|------------|-------------|--------------------------------------------|----------------|----------------|--------------------------------|--------------------------------------|----------|
|                                                   |                   |                                 | <u>AIC</u>                  | <u>BIC</u> | <u>aBIC</u> | <u>Statistic</u>                           | <u>p-value</u> |                |                                | <u>N</u>                             | <u>%</u> |
| 1                                                 | 28                | -84081.98                       | 168220                      | 168435     | 168346      | NA                                         | NA             | NA             | No                             | 15999                                | 100      |

|   |           |                 |                 |                 |                 |                |               |              |    |             |            |
|---|-----------|-----------------|-----------------|-----------------|-----------------|----------------|---------------|--------------|----|-------------|------------|
| 2 | 57        | -81434.76       | 162983.5        | 163421.3        | 163240.2        | 5275.640       | 0.0000        | 0.732        | No | 3088        | 19.3       |
| 3 | <b>86</b> | <b>-80982.6</b> | <b>162137.2</b> | <b>162797.7</b> | <b>162524.4</b> | <b>901.107</b> | <b>0.0000</b> | <b>0.753</b> | No | <b>1189</b> | <b>7.4</b> |
| 4 | 115       | -80718.91       | 161667.8        | 162551.1        | 162185.6        | 525.503        | 0.0000        | 0.617        | No | 464         | 2.9        |
| 5 | 144       | -80532.43       | 161352.9        | 162458.8        | 162001.2        | 371.640        | 0.0000        | 0.621        | No | 418         | 2.6        |

**PANEL D. Model fit indices for three+ time texter, first conversation, n=14,606**

| <u>Classes</u> | <u>Number of Free Parameters</u> | <u>Log Likelihood</u> | <u>Information Criteria</u> |               |                 | <u>LMR Likelihood Ratio Test</u> |                | <u>Entropy</u> | <u>Error Message</u> | <u>Smallest Class Size</u> |             |
|----------------|----------------------------------|-----------------------|-----------------------------|---------------|-----------------|----------------------------------|----------------|----------------|----------------------|----------------------------|-------------|
|                |                                  |                       | <u>AIC</u>                  | <u>BIC</u>    | <u>aBIC</u>     | <u>Statistic</u>                 | <u>p-value</u> |                |                      | <u>N</u>                   | <u>%</u>    |
| 1              | 28                               | -86887.53             | 173831.1                    | 174043.6      | 173954.6        | NA                               | NA             | NA             | No                   | 14606                      | 100         |
| 2              | 57                               | -83476.52             | 167067                      | 167499.6      | 167318.5        | 6797.576                         | 0.0000         | 0.829          | No                   | 3257                       | 22.3        |
| 3              | <b>86</b>                        | <b>-82755.65</b>      | <b>165683.3</b>             | <b>166336</b> | <b>166062.7</b> | <b>1436.561</b>                  | <b>0.0000</b>  | <b>0.816</b>   | No                   | <b>1554</b>                | <b>10.6</b> |
| 4              | 115                              | -82444.04             | 165118.1                    | 165990.8      | 165625.4        | 621.002                          | 0.0000         | 0.826          | No                   | 283                        | 1.9         |
| 5              | 144                              | -82158.01             | 164604                      | 165696.9      | 165239.2        | 570.010                          | 0.0000         | 0.723          | No                   | 439                        | 3.0         |

**PANEL E. Model fit indices for three+ time texter, last conversation, n=14,606**

| <u>Classes</u> | <u>Number of Free Parameters</u> | <u>Log Likelihood</u> | <u>Information Criteria</u> |                 |                 | <u>LMR Likelihood Ratio Test</u> |                | <u>Entropy</u> | <u>Error Message</u> | <u>Smallest Class Size</u> |             |
|----------------|----------------------------------|-----------------------|-----------------------------|-----------------|-----------------|----------------------------------|----------------|----------------|----------------------|----------------------------|-------------|
|                |                                  |                       | <u>AIC</u>                  | <u>BIC</u>      | <u>aBIC</u>     | <u>Statistic</u>                 | <u>p-value</u> |                |                      | <u>N</u>                   | <u>%</u>    |
| 1              | 28                               | -73526.94             | 147109.9                    | 147322.4        | 147233.4        | NA                               | NA             | NA             | No                   | 14606                      | 100         |
| 2              | 57                               | -71334.19             | 142782.4                    | 143215          | 143033.8        | 4369.783                         | 0.0000         | 0.663          | No                   | 2931                       | 20.1        |
| 3              | <b>86</b>                        | <b>-70911.97</b>      | <b>141995.9</b>             | <b>142648.6</b> | <b>142375.3</b> | <b>841.426</b>                   | <b>0.0384</b>  | <b>0.732</b>   | No                   | <b>1562</b>                | <b>10.7</b> |
| 4              | 115                              | -70656                | 141542                      | 142414.8        | 142049.3        | 510.098                          | 0.0063         | 0.599          | No                   | 605                        | 4.1         |
| 5              | 144                              | -70463.2              | 141214.4                    | 142307.3        | 141849.6        | 384.207                          | 0.0000         | 0.646          | No                   | 276                        | 1.9         |

<sup>a</sup>Data were from n=153,514 messages to Crisis Text Line 2013-2017 (n=122,909 individuals). Chosen model shown in bold italics. AIC, Akaike information criterion; BIC, Bayesian information criterion; aBIC, adjusted Bayesian information criterion; LMR, Lo-Mendell-Rubin; NA, Not applicable
